1 Phenotype-specific information improves prediction of  
2 functional impact for noncoding variants

3 Corneliu A. Bodea<sup>1,2,4</sup>, Adele A. Mitchell<sup>1</sup>, Heiko Runz<sup>1,5</sup>, and Shamil R.

4 Sunyaev<sup>2,3,4,5</sup>

5 <sup>1</sup>Department of Genetics and Pharmacogenomics, MRL, Boston, Massachusetts,  
6 USA.

7 <sup>2</sup>Division of Genetics, Department of Medicine, Brigham and Women's Hospital and  
8 Harvard Medical School, Boston, Massachusetts, USA.

9 <sup>3</sup>Department of Biomedical Informatics, Harvard Medical School, Boston,  
10 Massachusetts, USA.

11 <sup>4</sup>The Broad Institute of MIT and Harvard, Cambridge, Massachusetts, USA.

12 <sup>5</sup>These authors jointly supervised this work. Correspondence should be addressed to  
13 S.R.S. (ssunyaev@rics.bwh.harvard.edu).

14 **Abstract**

15 A myriad of noncoding genetic association signals are now awaiting the identification of  
16 causal alleles and their functional interpretation. We introduce the novel computational frame-  
17 work PINES (Phenotype-Informed Noncoding Element Scoring), which evaluates the functional  
18 impact of noncoding variants by integrating diverse epigenetic annotations. A unique feature of  
19 PINES is that it directs the analysis towards genomic annotations most relevant to phenotypes  
20 of interest. We show that PINES identifies functional noncoding variation more accurately than  
21 methods that do not use phenotype-specific knowledge. We apply PINES to fine map noncoding  
22 alleles at GWAS loci across a range of diseases, and predict new causal risk alleles for Parkinson's  
23 disease and inflammatory bowel disease. We also use PINES to confirm several high-penetrance  
24 variants implicated in Mendelian traits, as well as variants residing within known enhancer  
25 regions. PINES consistently identifies functional variants in fine mapping analyses, dissecting

26 pathogenic loci while avoiding the resource-intensive traditional fine mapping studies. Due to  
27 its flexibility and ease of use through a dedicated web portal, PINES provides a powerful *in*  
28 *silico* method to prioritize and fine map functional noncoding variants.

## 29 **1 Introduction**

30 A growing body of evidence suggests that DNA variants outside of protein-coding regions of the  
31 genome (here termed noncoding variants) impact human phenotypes, including the risk for common  
32 diseases. Many signals identified by genome-wide association studies (GWAS) point to regulatory  
33 regions as key determinants of complex traits. Likewise, some human Mendelian phenotypes such as  
34 hair, skin, and eye pigmentation are under the tight control of individual highly penetrant noncoding  
35 alleles [1, 2]. Thanks to whole genome sequencing (WGS), our ability to uncover novel noncoding  
36 alleles has increased substantially. However, studies of both common and rare phenotypes almost  
37 never resolve findings in noncoding regions to individual functional causal SNPs [3]. Functional  
38 prioritization of noncoding variants thus holds significant promise to assist in fine-mapping efforts  
39 and identify genetic lesions underlying Mendelian diseases.

40 To better understand the architecture of the noncoding genome, several large-scale efforts, such  
41 as ENCODE [4] and the Roadmap Epigenomics Project [5], have aimed to characterize the diverse  
42 landscape of histone modifications and DNA accessibility based on a wide range of assays across 127  
43 cell types. Other efforts such as the FANTOM5 project [6] have identified enhancer elements across  
44 the genome, and computational tools such as TargetFinder [7] have been developed to link such  
45 enhancers to the relevant gene promoters. Databases of chromatin interactions such as 4DGenome  
46 [8] are also helpful in identifying potential regulatory elements. Yet, while most genomic regions are  
47 by now annotated with a plethora of epigenetic features, the challenge remains to draw meaningful  
48 conclusions from these annotations, especially since the data are highly dimensional and many  
49 epigenetic features are correlated.

50 Several approaches have recently been introduced to prioritize potentially functional noncoding  
51 variants and address the complexity of the annotation data in a principled manner. These include  
52 Eigen [9], GWAVA [10], and CADD [11], as well as population genetics and conservation-inspired  
53 models such as PhastCons [12] and INSIGHT [13]. One drawback of models such as GWAVA is  
54 that they require a training dataset of both functional and non-functional examples. However,  
55 high-quality and particularly experimentally validated training data sets for noncoding variants are  
56 still very scarce and incomplete, thus limiting the prediction accuracy. A second drawback is that

57 current scoring methods globally merge annotations across many different cell types, which ignores  
58 the observation that regulatory elements often operate in a very cell type-specific manner [14].

59 We hypothesized that predicting the functional relevance of noncoding variants could benefit  
60 from taking into account the vast number of variants that have not yet been annotated as having  
61 any function (background variants), and use these as a baseline to search for variants that devi-  
62 ate significantly from this background. Such an approach falls under the category of PU (Positive  
63 and Unlabeled example) learning, or one-class classification, and is a well-studied machine learning  
64 method in the field of outlier detection [15, 16]. We further hypothesized that for identifying noncod-  
65 ing variants of potential relevance to a specific phenotype, integration of prior biological knowledge  
66 around the phenotype should increase prediction reliability. This prior knowledge can consist of  
67 relevant cell types, but also of relevant genes or pathways. To the best of our knowledge, no current  
68 method has the ability to integrate general phenotype-relevant knowledge into the scoring procedure  
69 in such a principled and flexible manner.

70 Here we introduce the Phenotype-Informed Noncoding Element Scoring (PINES) framework.  
71 PINES uses an unsupervised approach to systematically assess the functional significance of non-  
72 coding SNVs and indels, and allows to customize the search towards annotations considered as of  
73 highest relevance to a phenotype of interest. We apply PINES to *in silico* fine map noncoding  
74 variants at GWAS loci and predict novel causative SNPs at assumed promoter and enhancer regions  
75 for several common traits and diseases, including Parkinson’s disease, inflammatory bowel disease  
76 (IBD), multiple sclerosis, and blood lipid levels among others. We further show that PINES can be  
77 applied to assess a potential functional relevance of noncoding variants on Mendelian phenotypes.  
78 With its ease of use via a customizable web server we expect PINES to become a valuable resource  
79 for the interpretation of the noncoding human genome.

## 80 **2 Results**

### 81 **2.1 PINES integrates epigenetic information to score non-coding variants** 82 **in customizable queries**

83 Under a default setting, PINES integrates data from each of the 127 cell types analyzed in the  
84 Roadmap and ENCODE projects, specifically information on histone modifications indicative of  
85 promoters or enhancers (H3K4me1, H3K4me3, H3K27ac, H3K9ac), DNase I hypersensitive sites,  
86 sequence constraint scores (GERP, SiPhy), and ChromHMM chromatin state segmentations [17].

87 These data are applied to compare individual or a set of user-defined SNPs relative to the genomic  
88 background. Users may either apply PINES in a default mode, or pre-define sets of reference  
89 variants that are known to be linked to phenotypes of interest, or tissues of specific relevance to  
90 their respective scientific question. This allows that, if available, prior knowledge can be taken into  
91 account during the subsequent scoring process (see Figure 1 and Methods for details).

92 An important feature of PINES is its ability to incorporate prior biological information into the  
93 scoring procedure. When no prior knowledge is provided or available, equal weights are assigned  
94 to all features to perform an undirected scoring of variants. When prior information is provided  
95 (for instance a list of lead SNPs identified as significantly associated with a trait of interest through  
96 GWAS), PINES searches for annotations that are enriched in the provided dataset in order to learn  
97 which annotations are most relevant for the phenotype under consideration. Alternatively, users can  
98 manually specify the most phenotypically relevant tissue, and all annotations relevant to that tissue  
99 will be up-weighted by the scoring procedure. Prior information can additionally be specified in the  
100 form of separate annotations. By relying on an angle-based distance from the vector of the maximal  
101 possible annotation load in a de-correlated annotation space, PINES addresses both the correlation  
102 structure as well as the high dimensionality of epigenetic annotation data (see also Methods).

## 103 **2.2 PINES predicts causal noncoding variants with high confidence**

104 We illustrate the potential of PINES to fine map noncoding genomic regions implicated in Mendelian  
105 traits, as well as likely causal noncoding variants from GWAS loci. In order to test whether PINES  
106 correctly identifies and prioritizes functional noncoding SNPs, we applied the algorithm to *in silico*  
107 fine-map 20kb regions around seven noncoding alleles whose regulatory impact on a nearby gene  
108 had been confirmed experimentally: rs12350739 [18], rs356168 [19], rs6801957 [20], rs12821256 [21],  
109 rs138557689 [22], rs2473307 [23], and rs227727 [24] (Figure 2 and Supplementary Table 1). Such well-  
110 studied noncoding variants, although still rare in the current literature, provide an optimal testbed  
111 for scoring methods. Weighted PINES was used when genome-wide significant SNPs were identified  
112 by GWAS for the trait under consideration (see Methods). In all cases, PINES scores peak around  
113 the experimentally confirmed functional variants, and PINES assigns these causal variants the lowest  
114 p-values. Notably, comparative analyses using these regions demonstrate that PINES outcompetes  
115 GWAVA, CADD or Eigen in correctly identifying causal noncoding variants (see Supplementary  
116 Figures 1-7).

### 117 **2.3 PINES detects signal at fine mapped GWAS risk loci**

118 We next aimed to evaluate the ability of PINES to predict causal noncoding variants at GWAS loci  
119 across a range of conditions. As a first example for this, we extracted 3,625 candidate causal non-  
120 coding variants reported by a large statistical fine mapping study spanning 40 autoimmune diseases  
121 [25]. This study used densely-mapped genotyping data and the observed pattern of association at  
122 the LD locus to estimate each SNP's probability of being a causal variant. Since this collection  
123 aggregates multiple immune-related phenotypes we applied weighted PINES scores, where all an-  
124 notations corresponding to immune cells were equally up-weighted (see Methods). We compared  
125 the collective PINES signal on these 3,625 variants with the results obtained on an additional set  
126 of 30,000 background variants that we randomly selected across the genome. Q-Q plots detailing  
127 the results highlight a well-calibrated PINES null distribution and clear signal on the fine mapped  
128 variant set (Supplementary Figure 8). A comparison of the weighted PINES results with GWAVA,  
129 Eigen, and CADD show that PINES delivers the best predictive performance (Figure 3 first panel).

130 Next, we assessed the performance of PINES to nominate causal alleles from loci associated  
131 with individual common traits and diseases, including non-immune phenotypes. We extracted fine  
132 mapped candidate causal noncoding variants from [25] related to multiple sclerosis, celiac disease,  
133 inflammatory bowel disease, and blood lipid levels. We determined weighted and unweighted PINES  
134 scores for each of these variants, and compared the outcomes of PINES to those of GWAVA, Eigen  
135 and CADD. Phenotype-based annotation weights were automatically assigned based on GWAS data  
136 ([26, 27, 28, 29, 30, 31]). PINES consistently delivered the highest AUROC values, with up to 12%  
137 improvement over GWAVA, Eigen, or CADD when running PINES in the phenotype-weighted mode  
138 (Figure 3).

### 139 **2.4 PINES detects signal at expression-modulating variants identified in** 140 **a multiplexed reporter assay**

141 To test the performance of PINES to detect functional noncoding variants en masse, we used 230  
142 variants that were found to directly affect gene expression in a massively parallel reporter assay  
143 (MPRA) [32]. For the selection of variants we used an FDR cutoff (Benjamini-Hochberg) of 1%.  
144 MPRA is an extension of the traditional reporter gene setup, whereby the use of unique barcodes in  
145 the 3' UTR of the reporter differentiate expression of individual oligos and thus allow for testing of  
146 many different sequences simultaneously. Since most variants identified through this approach have  
147 not yet been linked to individual phenotypes, we performed an unweighted PINES analysis. PINES

148 delivered the highest AUROC values, with up to 43% improvement over GWAVA, Eigen, or CADD  
149 (Figure 4).

## 150 **2.5 PINES detects functional evidence for variants residing in FANTOM5** 151 **enhancers**

152 We next tested the power of PINES to correctly prioritize 9,000 variants residing within enhancers  
153 that have been identified by the FANTOM5 project through cap analysis of gene expression [6].  
154 As expected, PINES correctly assigned noncoding variants residing in these regions the highest  
155 relevance scores relative to genomic background variation. Importantly, in doing so PINES outscored  
156 GWAVA, Eigen, and CADD considerably, as demonstrated by a Wilcoxon signed rank test between  
157 the weighted PINES results and those of all other methods, which delivered p-values strictly below  
158  $10^{-60}$  (Figure 5).

## 159 **2.6 PINES predicts novel causal variants for Parkinson’s disease and IBD** 160 **through fine mapping of GWAS loci**

161 We next tested whether PINES can be applied to predict novel functional noncoding SNPs from  
162 GWAS loci. For this, we applied PINES to all GWAS loci associated in recent meta-analyses at  
163 genome-wide significance with Parkinson’s disease [33] and IBD [29]. We concentrated on those loci  
164 where all SNPs in LD of  $R^2 \geq 0.4$  to the GWAS lead SNP were either intronic or intergenic. For  
165 both Parkinson’s disease and IBD we used PINES to determine enrichment-based phenotype-specific  
166 weights from the complete set of significantly disease-associated GWAS SNPs. We then ran weighted  
167 PINES to fine map the most likely causal SNP across the 12 selected Parkinson’s disease loci and  
168 19 selected IBD loci. With this approach, PINES distinguished 16 novel noncoding alleles from the  
169 background that can be assumed with a high likelihood of being causal for conferring risk for Parkin-  
170 son’s disease (rs10878226, rs3756063, rs2301134, rs36121867, rs1954874, rs9275373, rs117896735) and  
171 IBD (rs35493230, rs2187892, rs4672507, rs4845604, rs2019262, rs10489630, rs12622128, rs55776317,  
172 rs7685642)(Figure 6 and Supplementary Tables 2 and 3).

## 173 **3 Discussion**

174 The field of human genetics has accumulated thousands of linkage and association signals. The focus  
175 is now rapidly shifting towards the identification of functional DNA variants underlying these signals,

176 biological interpretation of their roles, and generation of mechanistic hypothesis of disease etiology.  
177 However, the notion of biological function of an allele is diffuse. Genetically mediated phenotypic  
178 presentations are usually limited to a specific organ system, tissue or even cell type. Some of them are  
179 pleiotropic and affect several systems, but very few represent truly systemic disorders or traits that  
180 impact every cell in the body. This suggests that, from the genetic perspective, the notion of function  
181 only makes sense in the specific phenotypic context defined by cell type, developmental stage, and  
182 stimulus response. This is especially true for regulatory variants involved in transcriptional control.  
183 A number of recent studies showed that genetic association signals are enriched in putative regulatory  
184 elements, and that this enrichment is highly cell type-specific [25]. However, many experimental and  
185 almost all computational approaches to probe the functional effects of allelic variants are agnostic  
186 about the context of the phenotypic presentation.

187 Functional genomics is now actively embracing the multitude of contexts, starting from cell type  
188 variability in epigenetic annotations [5]. PINES leverages this annotation richness and attempts to  
189 predict the actual functional effect in the most relevant context rather than in the abstract framework  
190 of ubiquitous functional relevance. We note that simply restricting the analysis to the most relevant  
191 cell type is not the optimal approach. From purely statistical perspective, noisy correlated data  
192 provide information and should not be completely neglected. More importantly, from the biological  
193 perspective, many alleles are pleiotropic and many phenotypes are influenced by different biological  
194 processes in different organs, tissues and cells. For example, risk of myocardial infarction is partly  
195 influenced by blood lipids, but many genetic contributions are unrelated to blood lipid levels and  
196 are likely mediated by the vascular effects. All autoimmune diseases are influenced by the adaptive  
197 immune system, but individual conditions are limited to specific organs. PINES addresses this  
198 complexity to some degree through its customizable weighting of annotations. Additionally, many  
199 cell types that are relevant to a phenotype are currently not represented in the ENCODE and  
200 Roadmap datasets. The ability of PINES to leverage information from related cell types and tissues  
201 enables the analysis of noncoding variants even for such phenotypes. Finally, the noncoding genome  
202 has been consistently linked to human phenotypes through our knowledge of conservation, GWAS  
203 peak localization, and eQTLs, yet so far only few noncoding loci have been experimentally validated.  
204 This lack of unambiguously-defined functional noncoding loci makes the unsupervised approach used  
205 by PINES very versatile.

206 PINES can be easily queried through a web server in a similar manner to PolyPhen. This portal  
207 allows for scoring of noncoding SNVs based on user-defined weighting schemes, making PINES  
208 immediately applicable across a wide range of phenotypes. In addition, since the web server performs

209 all data processing, users can query PINES with minimal computational overhead. PINES allows for  
210 the addition of epigenetic annotations as they become available without requiring significant changes  
211 to the underlying statistical model or software implementation. Due to this ease of upgrading the  
212 underlying annotation database, we aim PINES to become an always-up-to-date resource for the  
213 scientific community.

214 In conclusion, PINES' ability to take advantage of a wide range of prior biological information  
215 allows it to improve on the predictive power of other methods, and to provide an enhanced priori-  
216 tization of phenotype-relevant variants. PINES avoids biases stemming from inaccurate labeling of  
217 training datasets, and benefits from increased power when prior information is available to direct  
218 analyses towards relevant annotations. There is a great need for such methods since identification  
219 of regulatory activity specific to a subgroup of cell types or tissues can greatly increase our un-  
220 derstanding of disease mechanisms. We have shown that PINES can assist in identifying functional  
221 noncoding variants in fine mapping analyses, both for complex disease and Mendelian traits, without  
222 requiring the significant resource expenditure involved in a traditional fine mapping study.

## 223 4 Acknowledgements

224 We would like to thank Dr. Ivan Adzhubey for help with setting up the PINES web server. We  
225 also acknowledge Dr. Alex Bloemendal for the suggestion to reduce the noise in the annotation  
226 covariance matrix by relying on a low-rank approximation of this matrix.

## 227 5 Online Methods

### 228 5.1 Annotation sources

229 PINES uses a wide range of annotations as part of the scoring algorithm. Open chromatin and  
230 histone modifications for 127 cell types and tissues were obtained from ENCODE and Roadmap  
231 Epigenomics ChIP-seq and DNase-seq peak sets. In order to capture combinatorial interactions  
232 between different chromatin marks in their spatial context, we used ChromHMM chromatin state  
233 segmentations from Roadmap Epigenomics computed via the standard 15-state HMM model. Chro-  
234 matin interaction data from a variety of assays (3C, 4C-Seq, 5C, Hi-C, ChIA-PET, Capture-C) were  
235 obtained from the 4DGenome database [8]. Additional DNaseI regions inferred via HMM from EN-  
236 CODE and Roadmap Epigenomics data were obtained from the Reg2Map database. Conservation  
237 was evaluated via GERP [34] and SiPhy [35].



238 Noncoding background variants were selected randomly across the genome, and we used the  
239 ClinVar database [36] and GWAS Catalog [37] to ensure that no overlap exists with known functional  
240 loci. For the analysis in Figure 3 we used GWAS studies of IBD [28, 29], celiac disease [27], blood  
241 lipid levels [30, 31], and multiple sclerosis [26] to determine enrichment-based weights for weighted  
242 PINES. We then used fine mapped variants on the corresponding phenotypes from [25] as our test  
243 set. All immune-related fine mapped variants in [25] with posterior probability  $\geq 0.2$  were used to  
244 generate the first panel in Figure 3. A list of FANTOM5 enhancers [6] was used to create Figure  
245 5. The analysis of all noncoding Parkinson’s disease and IBD loci (Figure 6) was based on regions  
246 identified in [33] and [29].

## 247 5.2 Working with a high-dimensional correlated annotation space

248 Individual variants are assigned a score of 0 or 1 for each of the annotations referenced above. In  
249 particular, each variant is characterized by a vector of length 639 composed as follows:

- 250 • Presence or absence of H3K4me1, H3K4me3, H3K27ac, H3K9ac, and DNase annotations for  
251 each of the 127 epigenomes (635 values).
- 252 • Presence or absence of a conserved region as predicted by GERP and SiPhy (2 values).
- 253 • Presence or absence of a DHS region as predicted by the ChromHMM 15 state model trained  
254 on all epigenomes (1 value).
- 255 • Presence or absence of a region involved in chromatin interactions with other regions as re-  
256 ported in the 4DGenome database (1 value).

257 In our annotation dataset, each variant is thus characterized by a vector of 635 cell type-specific  
258 scores and 4 cell type-independent scores. The joint distribution of this vector is difficult to ascertain  
259 explicitly due to its complex correlation structure; there are few outlier detection techniques that  
260 are robust to correlated data. One such approach is the one-class support vector machine (SVM)  
261 [38, 39, 40], which fits a hyperplane or hypersphere to the data in an attempt to isolate outlying  
262 points. One-class SVMs however suffer from a few disadvantages, such as difficulty in choosing  
263 tuning parameters, and the inability to add user-specified feature weights.

The alternative approach used in PINES is based on angular distances in a de-correlated annotation space. Let  $\mathbf{X}$  be the 639-dimensional matrix of annotations with covariance matrix  $\Sigma$  and mean vector  $\mu$ , and let  $\mathbf{W}$  be a diagonal matrix of annotation weights (which in an unweighted analysis is the identity matrix). Since  $\Sigma$  is a noisy estimate of the true correlation structure of  $\mathbf{X}$ , we perform

the spectral decomposition  $\Sigma = \sum_{i=1}^{639} \lambda_i \mathbf{u}_i \mathbf{u}_i^T$ , and compute a low-rank approximation of the estimated covariance matrix based on the first 30 eigenvectors (chosen by visual inspection of the scree plot):  $\hat{\Sigma} = \sum_{i=1}^{30} \lambda_i \mathbf{u}_i \mathbf{u}_i^T$ . The matrix  $\hat{\Sigma}^{-1}$  is obtained via the Moore-Penrose pseudo-inverse and is used to project annotation vectors corresponding to individual variants into a decorrelated annotation space via a Cholesky transformation:  $\hat{\Sigma}^{-1} = \sum_{i=1}^{30} \frac{1}{\lambda_i} \mathbf{u}_i \mathbf{u}_i^T$ . If  $\mathbf{x}$  is a vector of annotations, then the length of the vector projected into the decorrelated space is  $\sqrt{(\mathbf{x} - \mu)^T \mathbf{W} \hat{\Sigma}^{-1} \mathbf{W} (\mathbf{x} - \mu)}$ , which corresponds to the reweighed Mahalanobis distance to the mean vector  $\mu$  [41]. The cosine of the angle between the projections of two vectors  $\mathbf{x}$  and  $\mathbf{y}$  into the decorrelated annotation space is given by

$$\frac{(\mathbf{x} - \mu)^T \mathbf{W} \hat{\Sigma}^{-1} \mathbf{W} (\mathbf{y} - \mu)}{\sqrt{(\mathbf{x} - \mu)^T \mathbf{W} \hat{\Sigma}^{-1} \mathbf{W} (\mathbf{x} - \mu)} \cdot \sqrt{(\mathbf{y} - \mu)^T \mathbf{W} \hat{\Sigma}^{-1} \mathbf{W} (\mathbf{y} - \mu)}}$$

which corresponds to the correlation between the projections of  $\mathbf{x}$  and  $\mathbf{y}$ . In PINES we are specifically interested in the angle between the projection of a variant of interest and the projection of the all-1 annotation vector  $\mathbf{1}$ . This vector is significant since it provides the direction of a point with maximal annotation load, and thus the greatest evidence for functionality. Following the approach presented in [42], we additionally scale this angle by the length of the projected  $\mathbf{x}$  vector, resulting in the following PINES score:

$$\text{PINES}(\mathbf{x}) = \frac{\arccos \left[ \frac{(\mathbf{x} - \mu)^T \mathbf{W} \hat{\Sigma}^{-1} \mathbf{W} (\mathbf{1} - \mu)}{\sqrt{(\mathbf{x} - \mu)^T \mathbf{W} \hat{\Sigma}^{-1} \mathbf{W} (\mathbf{x} - \mu)} \cdot \sqrt{(\mathbf{1} - \mu)^T \mathbf{W} \hat{\Sigma}^{-1} \mathbf{W} (\mathbf{1} - \mu)}} \right]}{\sqrt{(\mathbf{x} - \mu)^T \mathbf{W} \hat{\Sigma}^{-1} \mathbf{W} (\mathbf{x} - \mu)} \cdot \sqrt{(\mathbf{1} - \mu)^T \mathbf{W} \hat{\Sigma}^{-1} \mathbf{W} (\mathbf{1} - \mu)}}$$

264 Smaller scores indicate greater evidence for functionality. Supplementary Figure 9 presents the re-  
 265 lationship between weighted PINES scores and annotation load in the original highly correlated  
 266 space on a simulated example, as well as the effect of introducing weights in the model. For this  
 267 simulation we generated 20 correlated Bernoulli random variables (representing the epigenetic anno-  
 268 tations). The diagonal weight matrix  $\mathbf{W}$  was constructed to assign weight 4 to one of the annotations  
 269 and weight 1 to the remaining features. The plot shows the relationship between annotation count  
 270 and PINES score, as well as shift in the score profile of observations that have the up-weighted  
 271 annotation (red points). Finally, to determine the significance level of a given score we compute an  
 272 empirical p-value based on a large set of background variants. These background variants represent  
 273 150,000 common variant sites (since rare variant sites can potentially harbor more penetrant muta-  
 274 tions) selected randomly across the genome and that are not represented in ClinVar or the GWAS  
 275 Catalogue.

### 276 **5.3 Background variants and the null distribution**

277 PINES makes use of a set of background SNPs against which to compare the score for new variants.  
278 We randomly selected 150,000 common variants across the genome to serve as background, none of  
279 which have been previously tied to phenotypes. Based on this background, PINES reports a one-  
280 sided p-value for each input variant, but the scores reported by CADD, GWAVA, and Eigen do not  
281 have an absolute unit of meaning and are thus not directly comparable. To enable this comparison  
282 we use the collection of background variants to determine a null distribution for each scoring method,  
283 and transform the raw CADD, GWAVA, and Eigen scores into empirical one-sided p-values based on  
284 their respective null distribution. This approach is similar to the one used to compute scaled CADD  
285 scores by transforming raw into rank-based scores [11]. Having performed this normalization, we  
286 can compare the results of PINES, CADD, GWAVA, and Eigen directly.

### 287 **5.4 Choice of feature weights**

288 Weighting of features can be performed manually, as was the case for the pigmentation variants  
289 presented in Figure 2, the first panel in Figure 3, and the simulation in Supplementary Figure 9, by  
290 setting the weight for biologically relevant annotations to a user-specified constant. Alternatively,  
291 when GWAS peaks are available, the weights used by PINES to differentiate between the different cell  
292 type-specific annotations are automatically computed based on the enrichment of each annotation  
293 across the GWAS loci. Enrichment within GWAS peaks for each annotation is used to set weights  
294 for the Parkinson’s disease, QRS prolongation, schizophrenia, and cleft lip and cleft palate variants  
295 presented in Figure 2. Such enrichment-based approaches are frequently used in predicting cell  
296 types contributing to specific phenotypes when GWAS or fine mapping data is available [25], with  
297 highly enriched annotations indicating potentially relevant cell types and disease mechanisms. In  
298 particular, we used the corresponding  $-\log_{10}(\text{enrichment p-value})$  as weight for every annotation,  
299 although different functional forms are possible. Regardless of whether a manual or enrichment-  
300 based weighting is employed to construct the matrix  $\mathbf{W}$ , no annotation will be completely excluded  
301 from the model. For example in a study of pigmentation, the objective is for variants that have  
302 melanocyte-related annotations as well as exhibit evidence of functionality in other cell types to  
303 receive more significant scores than variants that only have melanocyte-related annotations. Another  
304 reason to rely on data from multiple cell types, even when the phenotypic effect of variants is limited  
305 to a single, well characterized cell type, is to gain statistical power from accumulating noisy correlated  
306 datasets.

## 307 5.5 Other Methods

308 A few approaches have been recently proposed to score noncoding regions and address the complexity  
309 of the annotation data in a principled manner. The Genome-Wide Annotation of Variants method  
310 (GWAVA) [10] aims to predict the impact of noncoding genetic variants based on a random forest  
311 classifier, using variants reported in the Human GeneMutation Database (HGMD) as deleterious  
312 training data, and common SNPs from the 1000 Genomes Project as benign examples. The CADD  
313 approach [11] is based on the premise that harmful mutations are edged out of the gene pool over  
314 time via natural selection and that variation that has not been selected against is thus less likely to  
315 be deleterious. Notable for CADD is that it uses a dataset of simulated mutations for training, which  
316 is then compared to observed variants. A score of deleteriousness is assigned to every possible SNP in  
317 the human genome. One of the most recent methods, Eigen [9], is an unsupervised scoring framework  
318 that uses the eigen-decomposition of the covariance matrix associated with a collection of functional  
319 annotations to compute variant scores representing weighted sums of individual annotations.

## References

- 320
- 321 [1] Mijke Visser, Manfred Kayser, and Robert-Jan Palstra. Herc2 rs12913832 modulates human  
322 pigmentation by attenuating chromatin-loop formation between a long-range enhancer and the  
323 oca2 promoter. *Genome research*, 22(3):446–455, 2012.
- 324 [2] Hans Eiberg, Jesper Troelsen, Mette Nielsen, Annemette Mikkelsen, Jonas Mengel-From,  
325 Klaus W Kjaer, and Lars Hansen. Blue eye color in humans may be caused by a perfectly  
326 associated founder mutation in a regulatory element located within the herc2 gene inhibiting  
327 oca2 expression. *Human genetics*, 123(2):177–187, 2008.
- 328 [3] Dimitri J Stavropoulos, Daniele Merico, Rebekah Jobling, Sarah Bowdin, Nasim Monfared,  
329 Bhooma Thiruvahindrapuram, Thomas Nalpathamkalam, Giovanna Pellecchia, Ryan KC Yuen,  
330 Michael J Szego, et al. Whole-genome sequencing expands diagnostic utility and improves  
331 clinical management in paediatric medicine. *npj Genomic Medicine*, 1:15012, 2016.
- 332 [4] ENCODE Project Consortium et al. The encode (encyclopedia of dna elements) project. *Sci-*  
333 *ence*, 306(5696):636–640, 2004.
- 334 [5] Anshul Kundaje, Wouter Meuleman, Jason Ernst, Misha Bilenky, Angela Yen, Alireza Heravi-  
335 Moussavi, Pouya Kheradpour, Zhizhuo Zhang, Jianrong Wang, Michael J Ziller, et al. Integra-  
336 tive analysis of 111 reference human epigenomes. *Nature*, 518(7539):317–330, 2015.
- 337 [6] Erik Arner, Carsten O Daub, Kristoffer Vitting-Seerup, Robin Andersson, Berit Lilje, Finn  
338 Drabløs, Andreas Lennartsson, Michelle Rønnerblad, Olga Hrydziusko, Morana Vitezic, et al.  
339 Transcribed enhancers lead waves of coordinated transcription in transitioning mammalian cells.  
340 *Science*, 347(6225):1010–1014, 2015.
- 341 [7] Sean Whalen, Rebecca M Truty, and Katherine S Pollard. Enhancer-promoter interactions are  
342 encoded by complex genomic signatures on looping chromatin. *Nature genetics*, 48(5):488–496,  
343 2016.
- 344 [8] Li Teng, Bing He, Jiahui Wang, and Kai Tan. 4dgenome: a comprehensive database of chromatin  
345 interactions. *Bioinformatics*, 31(15):2560–2564, 2015.
- 346 [9] Iuliana Ionita-Laza, Kenneth McCallum, Bin Xu, and Joseph D Buxbaum. A spectral approach  
347 integrating functional genomic annotations for coding and noncoding variants. *Nature genetics*,  
348 2016.

- 349 [10] Graham RS Ritchie, Ian Dunham, Eleftheria Zeggini, and Paul Flicek. Functional annotation  
350 of noncoding sequence variants. *Nature methods*, 11(3):294–296, 2014.
- 351 [11] Martin Kircher, Daniela M Witten, Preti Jain, Brian J O’Roak, Gregory M Cooper, and Jay  
352 Shendure. A general framework for estimating the relative pathogenicity of human genetic  
353 variants. *Nature genetics*, 46(3):310, 2014.
- 354 [12] Adam Siepel, Gill Bejerano, Jakob S Pedersen, Angie S Hinrichs, Minmei Hou, Kate Rosen-  
355 bloom, Hiram Clawson, John Spieth, LaDeana W Hillier, Stephen Richards, et al. Evolution-  
356 arily conserved elements in vertebrate, insect, worm, and yeast genomes. *Genome research*,  
357 15(8):1034–1050, 2005.
- 358 [13] Ilan Gronau, Leonardo Arbiza, Jaaved Mohammed, and Adam Siepel. Inference of natural  
359 selection from interspersed genomic elements based on polymorphism and divergence. *Molecular*  
360 *biology and evolution*, page mst019, 2013.
- 361 [14] Gosia Trynka, Cynthia Sandor, Buhm Han, Han Xu, Barbara E Stranger, X Shirley Liu, and  
362 Soumya Raychaudhuri. Chromatin marks identify critical cell types for fine mapping complex  
363 trait variants. *Nature genetics*, 45(2):124–130, 2013.
- 364 [15] Bing Liu, Yang Dai, Xiaoli Li, Wee Sun Lee, and Philip S Yu. Building text classifiers using  
365 positive and unlabeled examples. In *Data Mining, 2003. ICDM 2003. Third IEEE International*  
366 *Conference on*, pages 179–186. IEEE, 2003.
- 367 [16] Peng Yang, Xiao-Li Li, Jian-Ping Mei, Chee-Keong Kwoh, and See-Kiong Ng. Positive-  
368 unlabeled learning for disease gene identification. *Bioinformatics*, 28(20):2640–2647, 2012.
- 369 [17] Jason Ernst and Manolis Kellis. Chromhmm: automating chromatin-state discovery and char-  
370 acterization. *Nature methods*, 9(3):215–216, 2012.
- 371 [18] Mijke Visser, Robert-Jan Palstra, and Manfred Kayser. Human skin color is influenced by an  
372 intergenic dna polymorphism regulating transcription of the nearby *bnc2* pigmentation gene.  
373 *Human molecular genetics*, page ddu289, 2014.
- 374 [19] Frank Soldner, Yonatan Stelzer, Chikdu S Shivalila, Brian J Abraham, Jeanne C Latourelle,  
375 M Inmaculada Barrasa, Johanna Goldmann, Richard H Myers, Richard A Young, and Rudolf  
376 Jaenisch. Parkinson-associated risk variant in distal enhancer of  $\alpha$ -synuclein modulates target  
377 gene expression. *Nature*, 533(7601):95–99, 2016.

- 378 [20] Malou van den Boogaard, Scott Smemo, Ozanna Burnicka-Turek, David E Arnolds, Harmen JG  
379 van de Werken, Petra Klous, David McKean, Jochen D Muehlschlegel, Julia Moosmann, Okan  
380 Toka, et al. A common genetic variant within *scn10a* modulates cardiac *scn5a* expression. *The*  
381 *Journal of clinical investigation*, 124(4):1844–1852, 2014.
- 382 [21] Catherine A Guenther, Bosiljka Tasic, Liqun Luo, Mary A Bedell, and David M Kingsley. A  
383 molecular basis for classic blond hair color in europeans. *Nature genetics*, 46(7):748–752, 2014.
- 384 [22] Nevena Cvjetkovic, Lorena Maili, Katelyn S Weymouth, S Shahrukh Hashmi, John B Mulliken,  
385 Jacek Topczewski, Ariadne Letra, Qiuping Yuan, Susan H Blanton, Eric C Swindell, et al.  
386 Regulatory variant in *fzd6* gene contributes to nonsyndromic cleft lip and palate in an african-  
387 american family. *Molecular genetics & genomic medicine*, 3(5):440–451, 2015.
- 388 [23] William P Gilks, Matthew Hill, Michael Gill, Gary Donohoe, Aiden P Corvin, and Derek W  
389 Morris. Functional investigation of a schizophrenia gwas signal at the *cdc42* gene. *The World*  
390 *Journal of Biological Psychiatry*, 2012.
- 391 [24] Elizabeth J Leslie, Margaret A Taub, Huan Liu, Karyn Meltz Steinberg, Daniel C Koboldt,  
392 Qunyuhan Zhang, Jenna C Carlson, Jacqueline B Hetmanski, Hang Wang, David E Larson, et al.  
393 Identification of functional variants for cleft lip with or without cleft palate in or near *pax7*,  
394 *fgr2*, and *nog* by targeted sequencing of gwas loci. *The American Journal of Human Genetics*,  
395 96(3):397–411, 2015.
- 396 [25] Kyle Kai-How Farh, Alexander Marson, Jiang Zhu, Markus Kleinewietfeld, William J Hous-  
397 ley, Samantha Beik, Noam Shores, Holly Whitton, Russell JH Ryan, Alexander A Shishkin,  
398 et al. Genetic and epigenetic fine mapping of causal autoimmune disease variants. *Nature*,  
399 518(7539):337–343, 2015.
- 400 [26] International Multiple Sclerosis Genetics Consortium, Wellcome Trust Case Control Consortium  
401 2, et al. Genetic risk and a primary role for cell-mediated immune mechanisms in multiple  
402 sclerosis. *Nature*, 476(7359):214–219, 2011.
- 403 [27] Patrick CA Dubois, Gosia Trynka, Lude Franke, Karen A Hunt, Jihane Romanos, Alessandra  
404 Curtotti, Alexandra Zhernakova, Graham AR Heap, Róza Ádány, Arpo Aromaa, et al. Mul-  
405 tiple common variants for celiac disease influencing immune gene expression. *Nature genetics*,  
406 42(4):295–302, 2010.

- 407 [28] Luke Jostins, Stephan Ripke, Rinse K Weersma, Richard H Duerr, Dermot P McGovern,  
408 Ken Y Hui, James C Lee, L Philip Schumm, Yashoda Sharma, Carl A Anderson, et al. Host-  
409 microbe interactions have shaped the genetic architecture of inflammatory bowel disease. *Nature*,  
410 491(7422):119–124, 2012.
- 411 [29] Jimmy Z Liu, Suzanne van Sommeren, Hailiang Huang, Siew C Ng, Rudi Alberts, Atsushi  
412 Takahashi, Stephan Ripke, James C Lee, Luke Jostins, Tejas Shah, et al. Association analyses  
413 identify 38 susceptibility loci for inflammatory bowel disease and highlight shared genetic risk  
414 across populations. *Nature genetics*, 47(9):979–986, 2015.
- 415 [30] Tanya M Teslovich, Kiran Musunuru, Albert V Smith, Andrew C Edmondson, Ioannis M  
416 Stylianou, Masahiro Koseki, James P Pirruccello, Samuli Ripatti, Daniel I Chasman, Cristen J  
417 Willer, et al. Biological, clinical and population relevance of 95 loci for blood lipids. *Nature*,  
418 466(7307):707–713, 2010.
- 419 [31] Global Lipids Genetics Consortium et al. Discovery and refinement of loci associated with lipid  
420 levels. *Nature genetics*, 45(11):1274–1283, 2013.
- 421 [32] Ryan Tewhey, Dylan Kotliar, Daniel S Park, Brandon Liu, Sarah Winnicki, Steven K Reilly,  
422 Kristian G Andersen, Tarjei S Mikkelsen, Eric S Lander, Stephen F Schaffner, et al. Direct  
423 identification of hundreds of expression-modulating variants using a multiplexed reporter assay.  
424 *Cell*, 165(6):1519–1529, 2016.
- 425 [33] Mike A Nalls, Nathan Pankratz, Christina M Lill, Chuong B Do, Dena G Hernandez, Mohamad  
426 Saad, Anita L DeStefano, Eleanna Kara, Jose Bras, Manu Sharma, et al. Large-scale meta-  
427 analysis of genome-wide association data identifies six new risk loci for parkinson’s disease.  
428 *Nature genetics*, 46(9):989–993, 2014.
- 429 [34] Eugene V Davydov, David L Goode, Marina Sirota, Gregory M Cooper, Arend Sidow, and  
430 Serafim Batzoglou. Identifying a high fraction of the human genome to be under selective  
431 constraint using *gerp++*. *PLoS Comput Biol*, 6(12):e1001025, 2010.
- 432 [35] Manuel Garber, Mitchell Guttman, Michele Clamp, Michael C Zody, Nir Friedman, and Xi-  
433 aohui Xie. Identifying novel constrained elements by exploiting biased substitution patterns.  
434 *Bioinformatics*, 25(12):i54–i62, 2009.
- 435 [36] Melissa J Landrum, Jennifer M Lee, Mark Benson, Garth Brown, Chen Chao, Shanmuga  
436 Chitipiralla, Baoshan Gu, Jennifer Hart, Douglas Hoffman, Jeffrey Hoover, et al. Clinvar: public



437 archive of interpretations of clinically relevant variants. *Nucleic acids research*, 44(D1):D862–  
438 D868, 2016.

439 [37] Danielle Welter, Jacqueline MacArthur, Joannella Morales, Tony Burdett, Peggy Hall, Heather  
440 Junkins, Alan Klemm, Paul Flicek, Teri Manolio, Lucia Hindorff, et al. The nhgri gwas catalog,  
441 a curated resource of snp-trait associations. *Nucleic acids research*, 42(D1):D1001–D1006, 2014.

442 [38] Bernhard Schölkopf, John C Platt, John Shawe-Taylor, Alex J Smola, and Robert C Williamson.  
443 Estimating the support of a high-dimensional distribution. *Neural computation*, 13(7):1443–  
444 1471, 2001.

445 [39] Larry M Manevitz and Malik Yousef. One-class svms for document classification. *the Journal*  
446 *of machine Learning research*, 2:139–154, 2002.

447 [40] David MJ Tax and Robert PW Duin. Support vector data description. *Machine learning*,  
448 54(1):45–66, 2004.

449 [41] Robert A Greevy, Carlos G Grijalva, Christianne L Roumie, Cole Beck, Adriana M Hung,  
450 Harvey J Murff, Xulei Liu, and Marie R Griffin. Reweighted mahalanobis distance match-  
451 ing for cluster-randomized trials with missing data. *Pharmacoepidemiology and drug safety*,  
452 21(S2):148–154, 2012.

453 [42] Hans-Peter Kriegel, Arthur Zimek, et al. Angle-based outlier detection in high-dimensional data.  
454 In *Proceedings of the 14th ACM SIGKDD international conference on Knowledge discovery and*  
455 *data mining*, pages 444–452. ACM, 2008.

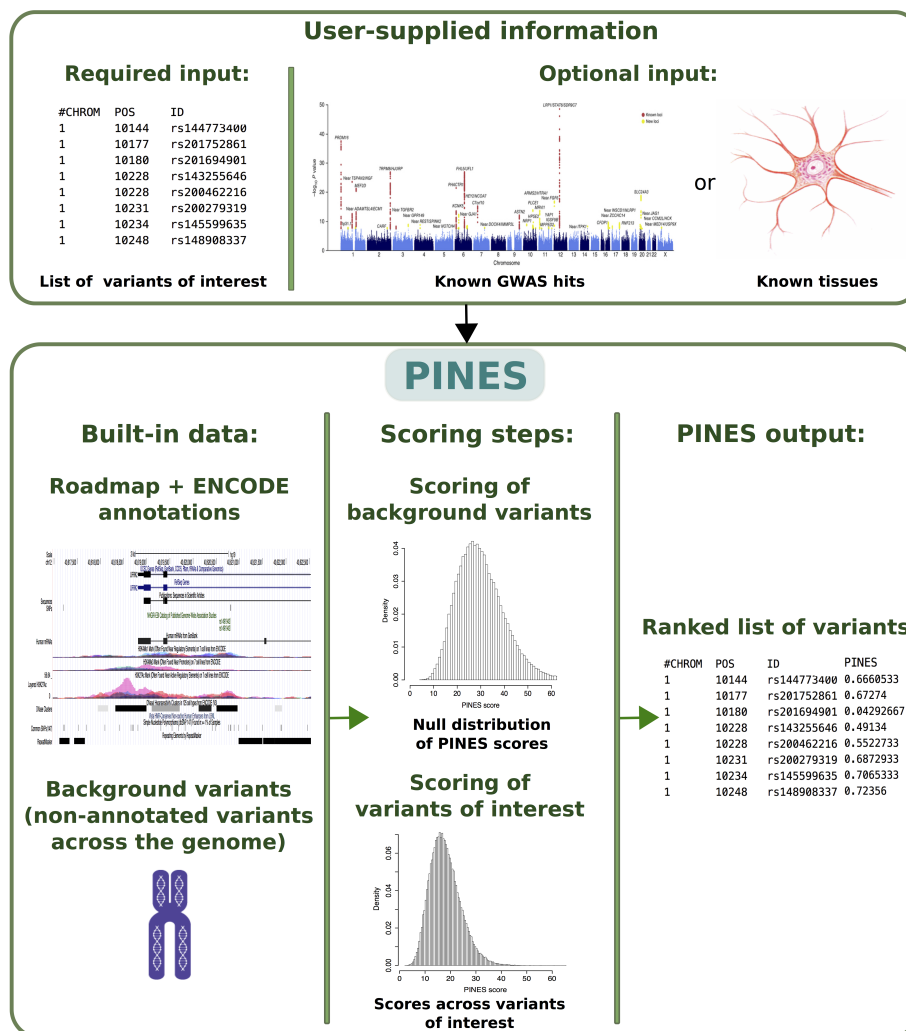

Figure 1: Overview of the PINES framework. PINES aims to systematically predict and rank the functional relevance of noncoding genomic variants. It can either work in a default (“unweighted”) mode and compare user-defined variants against the genomic background. Alternatively, users can customize searches towards annotations considered as of highest relevance to a phenotype of interest, for instance by providing a list of SNPs associated with a disease of interest through GWAS, or by highlighting disease-relevant tissues (“weighted” PINES mode). Scores of genomic background variants serve as an empirical null distribution against which significance levels for each variant of interest are computed and scored in an output file.

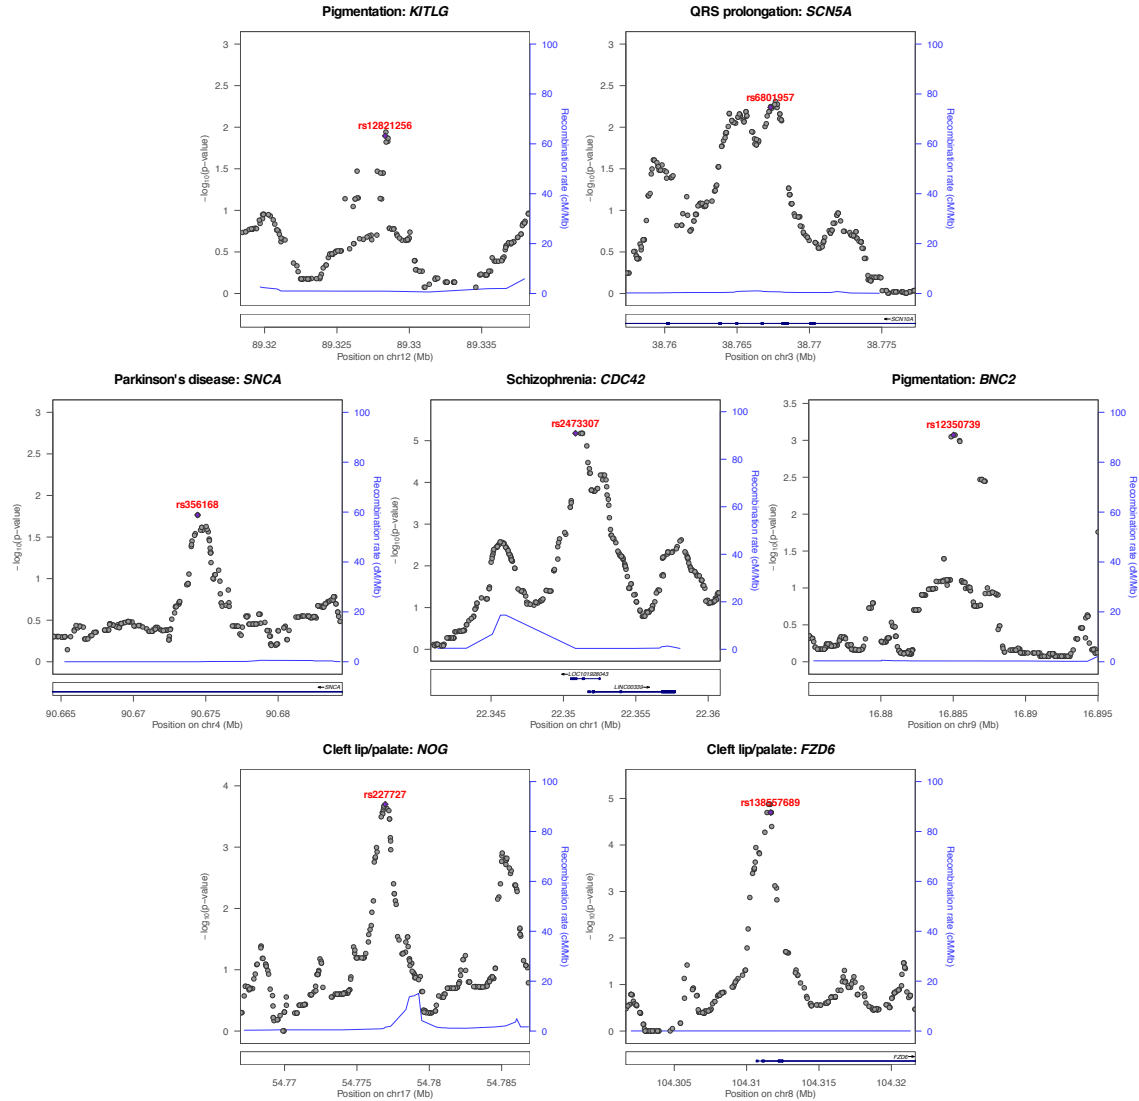

Figure 2: PINES prioritizes experimentally validated functional noncoding variants. We fine map 20kb regions surrounding functional noncoding variants (purple dots) and show that all of the variants validated experimentally as regulating expression of a nearby trait-associated gene are also assigned the highest PINES scores. Supplementary Figures 1-7 show that PINES outperforms existing methods on all loci.

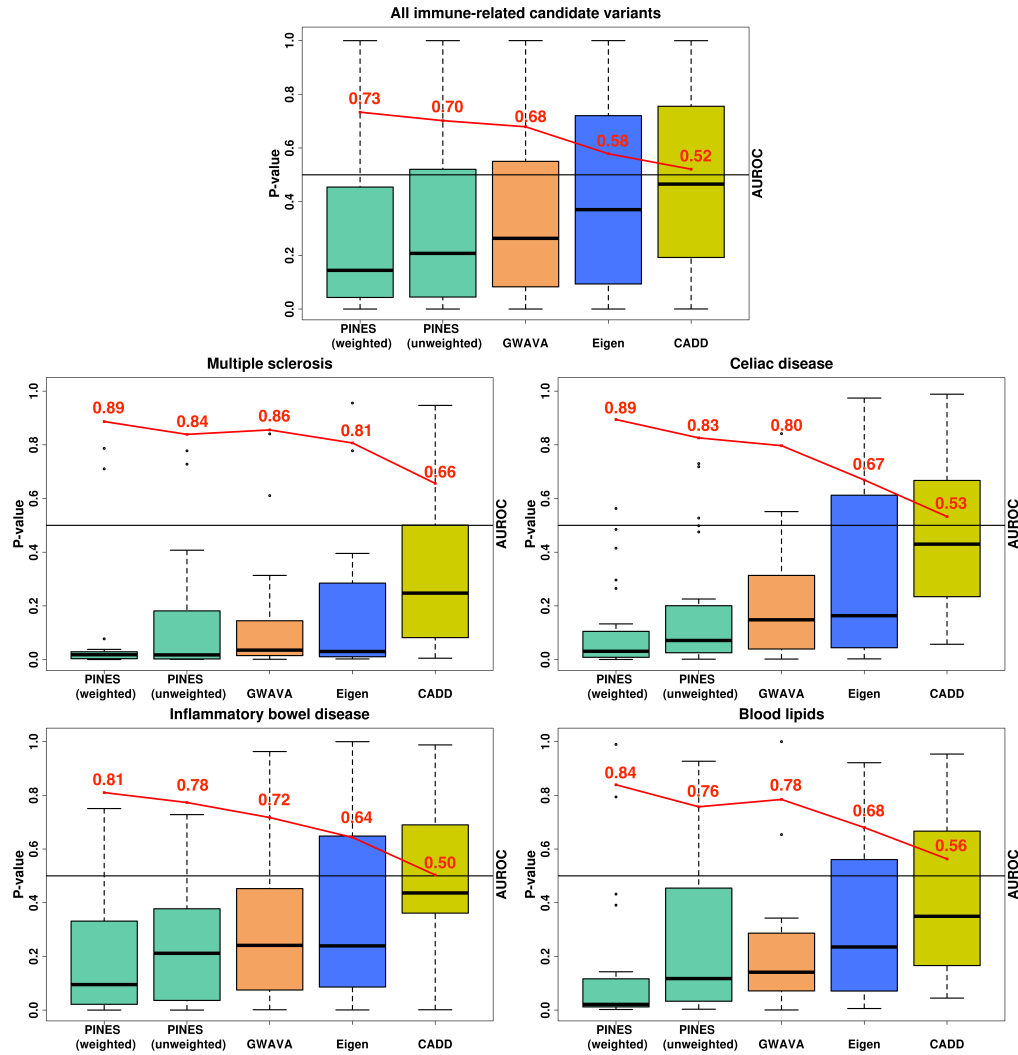

Figure 3: PINES improves statistical power to detect fine mapped variants across common neurologic, immune, and metabolic traits and diseases. AUROC values (red) were computed by selecting 20,000 background variants as negative examples, and the fine mapped variants relevant to each disease as positive examples. PINES achieves the best AUROC values, of to 12% higher than the other methods, based on its inclusion of weights encoding prior disease knowledge (in this case relevant cell types).

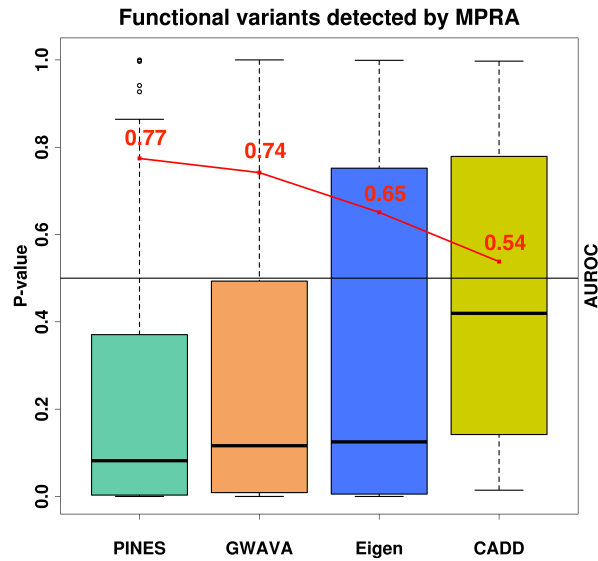

Figure 4: PINES delivers improved statistical power to identify functional noncoding variants detected by a massively parallel reporter assay. The AUROC values (red) were computed by selecting 20,000 background variants as negative examples, and the reported functional variants as positive examples. With AUROC values up to 43% higher than the other methods, PINES outperforms GWAVA, Eigen, and CADD in its ability to detect the functional variants.

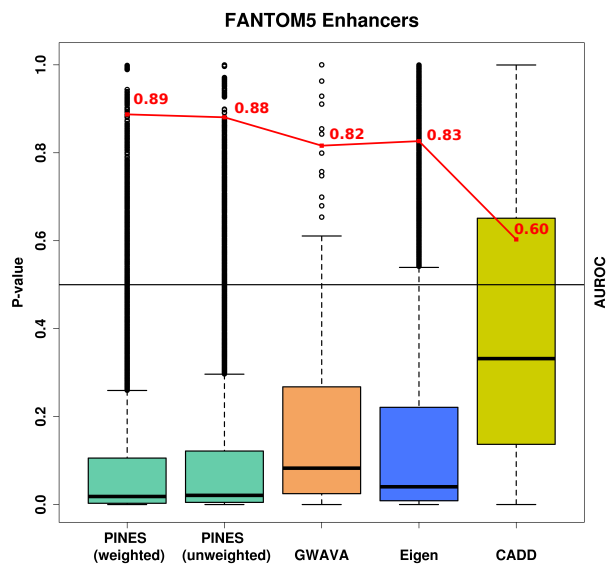

Figure 5: PINES improves the prioritization of variants residing in experimentally validated enhancer regions. The AUROC values (red) were computed by selecting 20,000 background variants as negative examples, and the variants residing in enhancer loci as positive examples. Based on AUROC values, the weighted PINES approach outperforms GWAVA, Eigen, and CADD in its ability to pinpoint enhancer variants. Additionally, testing whether the weighted PINES significance levels are smaller than those of other methods via a Wilcoxon signed rank test delivers p-values that are all below  $10^{-60}$ .

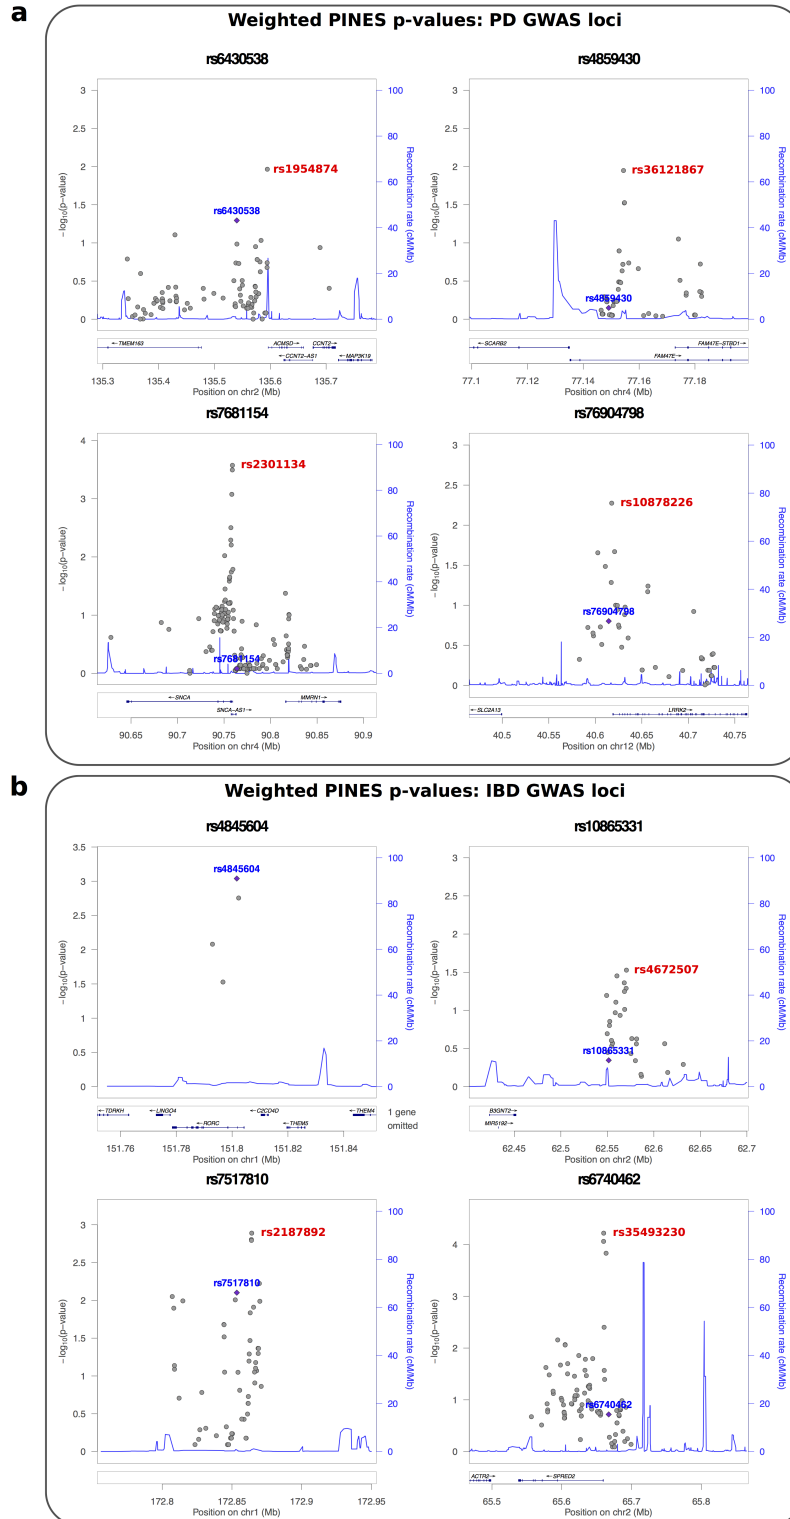

Figure 6: PINES predicts novel noncoding pathogenic variants through fine mapping of Parkinson’s disease and IBD GWAS loci. Loci were extracted from [33] and [29]. For each lead SNP, all variants with  $LD \geq 0.4$  were selected, and loci were discarded if this list overlapped any coding regions or 3’ or 5’ UTRs of coding genes. All variants in LD to the lead SNP were scored via weighted PINES. The GWAS lead SNP is marked blue, and the variant predicted as likely causal through PINES fine mapping is marked red. For the rs4845604 locus the GWAS and PINES lead SNP overlaps.
